# Supplementary material for: Soluble SIGLEC5: A New Prognosis Marker in Colorectal Cancer Patients
Source: MDPI journal article supplement (doi:10.3390/cancers13153896), 2021-08-02
Supplement: s1 [file s1]

Supplementary

# Soluble SIGLEC5: A New Prognosis Marker in Colorectal Cancer Patients

Karla Montalbán-Hernández et al.

**Table S1.** Predictive values for the different survival factors.

| Survival Factor         | AUC    | 95% CI            | Sensitivity | Specificity | PPV  | NPV | Chi-squared | <i>p</i> value |
|-------------------------|--------|-------------------|-------------|-------------|------|-----|-------------|----------------|
| sSIGLEC5                | 0.853  | 0.7729–<br>0.9344 | 1           | 0.67        | 0.26 | 1   | 19.15       | <0.0001****    |
| TNM                     | 0.715  | 0.5754–<br>0.8546 | 1           | 0.23        | 0.13 | 1   | 3.77        | 0.0522         |
| Therapeutic Information | 0.5207 | 0.3294–<br>0.7119 | 0.45        | 0.54        | 0.1  | 0.9 | 0.088       | 0.0881         |

\*\*\*\*,  $p < 0.0001$

**Table S2.** Eliminated variables from logistic regression model.

|                          |                         | Score  | <i>p</i> value |
|--------------------------|-------------------------|--------|----------------|
| <b>Variables</b>         | Age                     | 1,164  | 0,281          |
|                          | Sex                     | 0,817  | 0,366          |
|                          | Disease Stage           | 0,198  | 0,656          |
|                          | Perineural Invasion     | 1,080  | 0,299          |
|                          | Lymphovascular Invasion | 1,439  | 0,230          |
|                          | Chemotherapy            | 0,067  | 0,796          |
|                          | TNM – Tumour Size       | 1,151  | 0,283          |
|                          | TNM – Node Infiltration | 3,050  | 0,081          |
|                          | TNM - Metastasis        | 2,217  | 0,136          |
|                          | Surgical Margins        | 0,001  | 0,978          |
|                          | CEA                     | 2,187  | 0,139          |
| <b>Global Statistics</b> |                         | 14,450 | 0,209          |

Wald forward conditional stepwise regression, including age, gender, disease stage, treatment, tumour size, metastasis, node infiltration, lymphovascular invasion, perineural invasion, surgical margins, CEA, tumour dedifferentiation and sSIGLEC5 levels as variables. Eliminated variables after two steps are shown. Units: age in years and CEA in ng/mL.

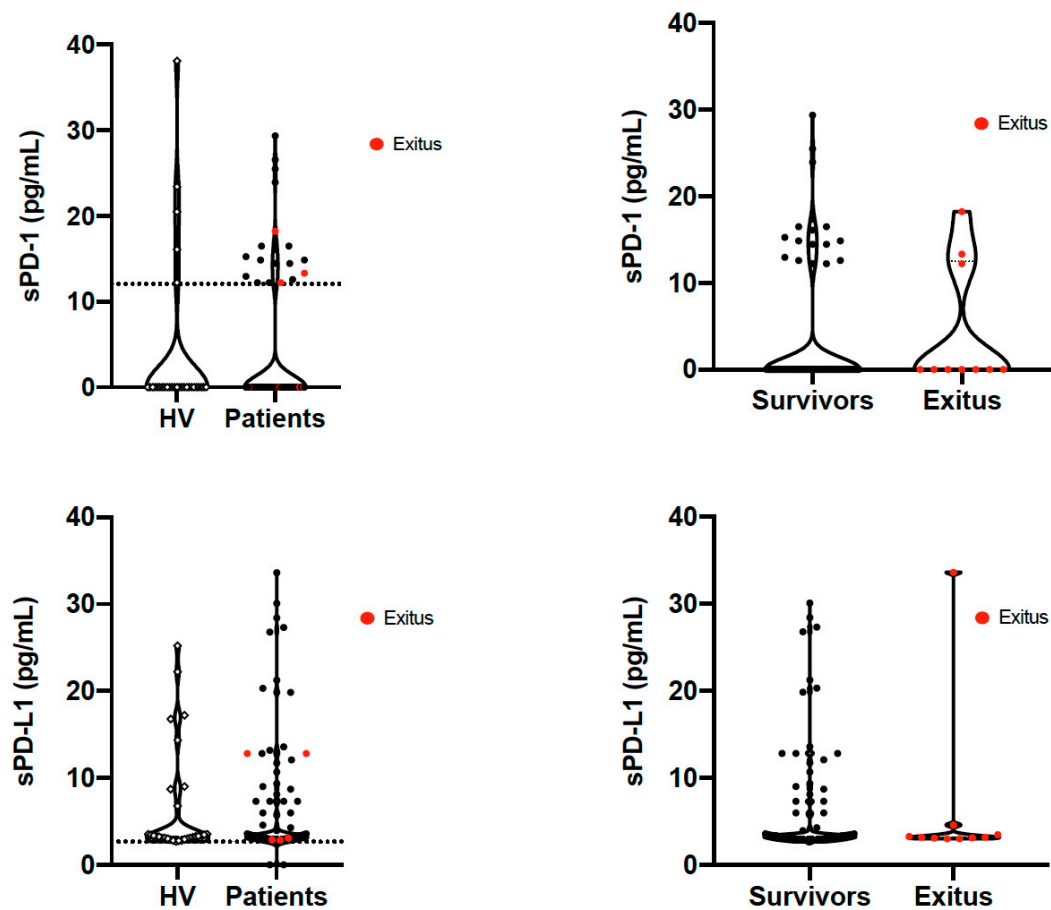

Figure S1. Pre-operative soluble immune checkpoints in colorectal cancer patients.

**A**

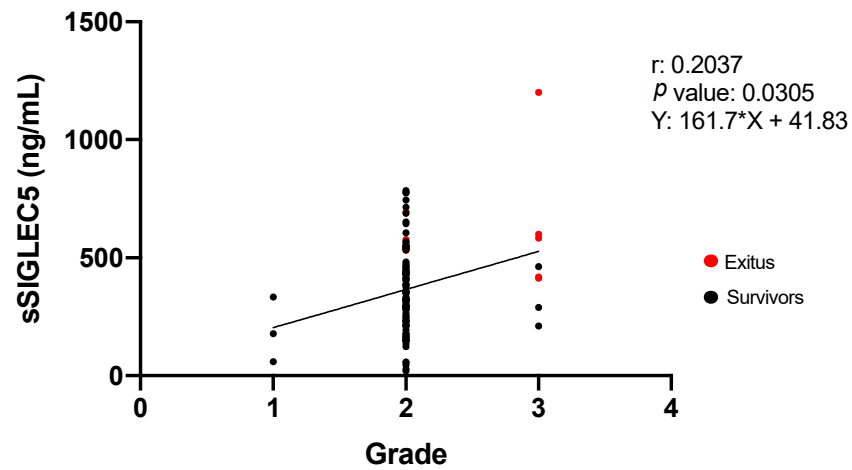

**B**

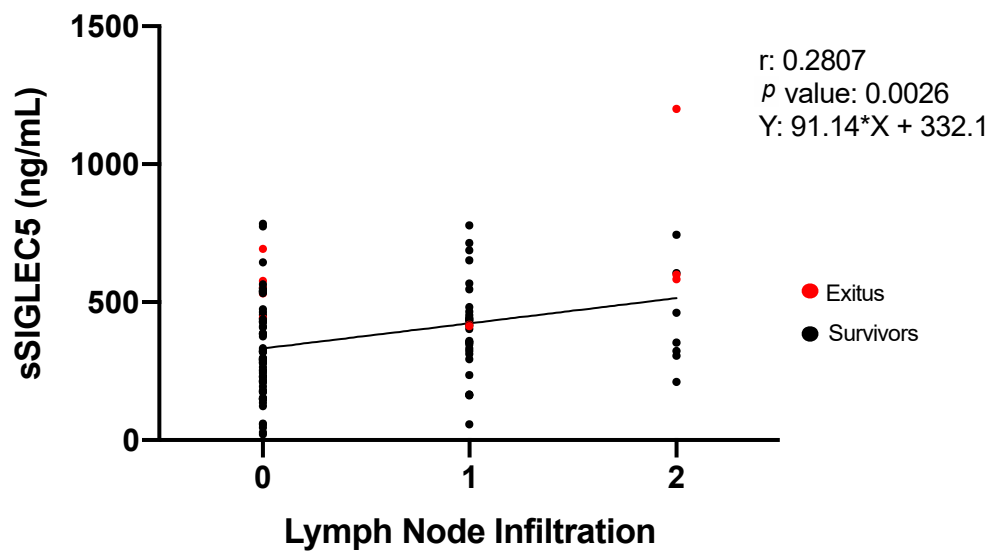

**Figure S2.** Pre-operative sSIGLEC5 levels correlate with (A) tumour dedifferentiation and (B) lymph node metastasis, and Table S1: Predictive values for the different survival factors.
